# Supplementary material for: The effect of Earth’s rotation on the mid Holocene sea-level highstand
Source: Research Square preprint supplement (doi:10.21203/rs.3.rs-7628402/v1), 2025-10-27
Supplement: Supplementary file 1 [file 8109c902a7c611dba8c5e67a.xlsx]

## Sheet: All proxy data
Region	Site/Subregion	long (E)	lat (N)	Data retrieved from	Indicator	Depos environ/liv range/RWL	Material for dating	Calibrated age (ka)	uncert (ka;2σ)	Palaeo-mean RSL (m)	uncert (m, 1s)	Quality	Used for model examination	Reference	Elevation measurement technique	Comment
		decimal	decimal
Bohai Sea	southern coast	119.15	36.9	core	facies	supra tidal flat	Bithynia fuchsiana	7.07	0.094	1.62	1.32	SLIP	n/a	Tian et al 2025
Bohai Sea	southern coast	119.14	37.03	core	facies	mid flat	Umbonium thomasi	5.45	0.178	2	0.59	SLIP	n/a	Tian et al 2025
Bohai Sea	southern coast	118.7	37.14	core	facies	upp tidalflat	foraminifera	5.65	0.23	2.02	0.77	SLIP	yes	Tian et al 2025
Bohai Sea	southern coast	119.14	37.03	core	facies	upp tidalflat	Meretrix meretrix	7.56	0.166	-4.19	0.31	SLIP	n/a	Tian et al 2025
Bohai Sea	southern coast	119.04	37.09	core	facies	mid-lower flat	Potamocorbula laevis	4.51	0.23	1.25	0.58	SLIP	n/a	Tian et al 2025
Bohai Sea	southern coast	119.12	37.1	core	facies	mid-lower flat	Umbonium thomasi	2.95	0.2	0.51	0.58	SLIP	n/a	Tian et al 2025
E China Sea	Hangzhou Bay	120.15	30.3	cores	facies from diatoms	HAT-MSL	plant	4.72	0.012	0.34	0.23	SLIP	n/a	Xiong et al 2020		south of Yantze delta, subsidence corrected
E China Sea	Hangzhou Bay	120.15	30.3	cores	facies from diatoms	HAT-MSL	bulk organic	6.24	0.05	0.47	0.23	SLIP	yes	Xiong et al 2020
E China Sea	Hangzhou Bay	120.15	30.3	cores	facies from diatoms	HAT-MSL	bulk organic	6.94	0.09	0.12	0.23	SLIP	n/a	Xiong et al 2020
E China Sea	Hangzhou Bay	120.15	30.3	cores	facies from diatoms	HAT-MSL	plant	4.44	0.05	-0.41	0.23	SLIP	n/a	Xiong et al 2020
S China Sea	Hainan	109.45	18.28	outcrop	beachrock	MTL-MHW	?	5.176	0.461	1	0.5	SLIP	n/a	Zong 2004		delta effect unclear; recal this study, DR=-135±34
S China Sea	Hainan	109.45	18.28	outcrop	beachrock	MTL-MHW	?	4.441	0.548	1.2	0.5	SLIP	n/a	Zong 2004		delta effect unclear; recal this study, DR=-135±34
S China Sea	Hainan	109.45	18.28	outcrop	beachrock	MTL-MHW	?	3.835	0.284	1.5	0.5	SLIP	yes	Zong 2004		delta effect unclear; recal this study, DR=-135±34
S China Sea	Hainan	109.45	18.28	outcrop	beachrock	MTL-MHW	?	1.561	0.249	0.2	0.5	SLIP	n/a	Zong 2004		delta effect unclear; recal this study, DR=-135±34
S China Sea	Dengloujiao	109.918	20.251	outcrop	microatoll	fringing reef	coral	6.75	0.08	2.2	0.85	SLIP	yes	Yu et al 2009
S China Sea	Dengloujiao	109.918	20.251	outcrop	microatoll	fringing reef	coral	6.69	0.02	1.86	0.85	SLIP	n/a	Yu et al 2009
S China Sea	Dengloujiao	109.918	20.251	outcrop	microatoll	fringing reef	coral	7.01	0.04	1.93	0.85	SLIP	n/a	Yu et al 2009
Japan	Shimokita	141.334	41.334	core	facies	base of marsh	wood	4.937	0.1	1.81	0.25	SLIP	yes	Yokoyama et al 2012		recal this study using Intcal20
Japan	Shimokita	141.334	41.334	core	facies	base of marsh	plant	4.026	0.123	0.64	0.25	SLIP	n/a	Yokoyama et al 2012		recal this study using Intcal20
Singapore		103.88	1.34	excavation	facies	upp int	wood	6.15	0.24	2.27	1.1	SLIP	yes	Bird et al 2007 recal by Chua et al 2021	dGPS, ±0.5m	Sunda shelf affected by 'thermoflexural' deformation
Singapore		103.65	1.354		facies	HAT to MHWS	wood	5.8	0.47	3.67	1.09	SLIP	no	Bird et al 2007 recal by Chua et al 2021		considerable differences between SLIPs; authors agree on a hs 2.7-3.1m at ~6.2 ka
Singapore		103.85	1.295	core	facies	MHWS	wood	6.83	0.15	1.15	1.24	SLIP	n/a	Bird et al 2007 recal by Chua et al 2021
Singapore		103.975	1.398		facies	MLW or below	coral	4.58	0.35	0.86	1.26	SLIP	n/a	Bird et al 2007 recal by Chua et al 2021
Malay Peninsula	Ko Na Khae	98.5	8.24	outcrop	borings in notch	HAT-LAT	oyster	3.73	0.1	0.38	1.92	SLIP	n/a	Scheffers et al 2012 updated by Mann et al 2019	manual levelling and dGPS	affected by flexure
Malay Peninsula	Ko Pha Nak Hong	98.49	8.19	outcrop	oyster in hong	HAT-LAT	oyster	5.73	0.12	1.5	1.89	SLIP	no	Scheffers et al 2012 updated by Mann et al 2019	manual levelling and dGPS	affected by flexure
Malay Peninsula	Ko Pha Nak Hong	98.49	8.19	outcrop	oyster in hong	HAT-LAT	oyster	3.456	0.09	0.8	1.89	SLIP	n/a	Scheffers et al 2012 updated by Mann et al 2019	manual levelling and dGPS	affected by flexure
Malay Peninsula	Kelang	103.25	3	?	mangrove swamp	HAT-MTL	plant remain (?)	6.35	0.06	3.6	1.23	SLIP	yes	Kamaludin 2001 updated by Mann et al 2019
Malay Peninsula	Kelang	103.25	3	?	mangrove swamp	HAT-MTL	plant remain (?)	4.53	0.12	3.06	1.23	SLIP	n/a	Kamaludin 2001 updated by Mann et al 2019
Malay Peninsula	Kelang	103.25	3	?	mangrove swamp	HAT-MTL	plant remain (?)	4.41	0.12	2.18	1	SLIP	n/a	Kamaludin 2001 updated by Mann et al 2019
Malay Peninsula	Strait of Malacca	103.38	1.48	outcrop	basis of peat	HAT-MSL	peat	5.67	0.29	3.25	0.72	terr lim	no	Geyh et al 1979 updated by Mann et al 2019	not reported
Malay Peninsula	Strait of Malacca	103.18	1.43	?	basis of peat	HAT-MSL	peat	4.96	0.34	2.47	0.37	terr lim	no	Geyh et al 1979 updated by Tam et al 2018		RF3L20-ICE4G and Bradley et al 2016 predict hs at ca 3.0-3.5 m at 7-5 ka
Malay Peninsula	Kuantan	103.301	3.768	core	mangrove pollen	HAT-MSL	plant remain	4.04	0.11	1.97	0.43	SLIP	yes	Zhang et al 2021	leveling	estuarine mud used; compaction corrected; postulates ca 1m lower hs on the east coast compared to west coast, but timing is the same
Malay Peninsula	Kuantan	103.301	3.768	core	mangrove pollen	HAT-MSL	plant remain	2.97	0.1	0.99	0.46	SLIP	n/a	Zhang et al 2021	leveling	estuarine mud used; compaction corrected
Malay Peninsula	Kuantan	103.301	3.768	core	mangrove pollen	HAT-MSL	plant remain	6.55	0.09	1.38	0.56	SLIP	n/a	Zhang et al 2021	leveling	estuarine mud used; compaction corrected
Malay Peninsula	Strait of Malacca	103.02	1.77	outcrop	basis of peat	HAT-MSL	peat	2.2	0.5	1.38	0.74	terr lim	no	Geyh et al 1979 updated by Mann et al 2019	not reported
Maldives	south Maalhosmadulu atoll	74.3	2.77	core	microatoll	MWL-LAT	coral	3.45	0.12	0.18	0.56	SLIP (2s)	n/a	Kench et al 2009 updated by Mann et al 2019	water level pressure sensor
Maldives	south Maalhosmadulu atoll	74.3	2.77	core	microatoll	MWL-LAT	coral	2.11	0.16	0.37	0.56	SLIP (2s)	yes	Kench et al 2009 updated by Mann et al 2019
Sunda shelf	Belitung island TBAT	108.081	-3.233	outcrop	microatoll diedown	HLS	coral	6.53	0.13	1.2	0.09	SLIP	n/a	Meltzner et al 2017		HLS=highest level of survival
Sunda shelf	Belitung island TKUB	107.628	-2.695	outcrop	microatoll diedown	HLS	coral	6.74	0.33	1.9	0.09	SLIP	yes	Meltzner et al 2017
Sunda shelf	Belitung island TKUB	107.628	-2.695	outcrop	microatoll diedown	HLS	coral	6.683	0.21	1.6	0.09	SLIP	n/a	Meltzner et al 2017
Java	Teluk Awur	110.71	-7.61	cliff outcrop	microatoll, (upper) horizon 2	MLW-LAT	P. lobata coral	6.4	0.22	1.82	0.59	SLIP	yes	Azmy et al 2010 updated by Mann et al 2019	not reported
Java	Teluk Awur	110.71	-7.61	cliff outcrop	microatoll, (lower) horizon 1	MLW-LAT	P. lobata coral	6.69	0.26	1.52	0.59	SLIP	n/a	Azmy et al 2010 updated by Mann et al 2019	not reported
Sulawesi	Pulau Panambungan	119.36	-4.95	outcrop	microatoll	MLW-LAT	coral	5.66	0.18	0.49	0.3	SLIP	n/a	Mann et al 2016 updated by Mann et al 2019	dGPS	away from large strike-slip faults, ENSO affected
Sulawesi	Pulau Panambungan	119.36	-4.95	outcrop	microatoll	MLW-LAT	coral	5.62	0.19	0.53	0.3	SLIP	yes	Mann et al 2016 updated by Mann et al 2019
Sulawesi	Pulau Panambungan	119.36	-4.95	outcrop	microatoll	MLW-LAT	coral	4.33	0.22	0.1	0.3	SLIP	n/a	Mann et al 2016 updated by Mann et al 2019
Sulawesi	Sanrobengi	119.21	-5.2	outcrop	microatoll	MLW-LAT	coral	5.96	0.084	0.22	0.12	SLIP	n/a	Bender et al 2020
Sulawesi	Sanrobengi	119.21	-5.2	outcrop	microatoll	MLW-LAT	coral	5.551	0.078	0.32	0.13	SLIP	yes	Bender et al 2020
Sulawesi	Sanrobengi	119.21	-5.2	outcrop	microatoll	MLW-LAT	coral	4.74	0.095	0.32	0.13	SLIP	n/a	Bender et al 2020
Sulawesi	Kodingareng Keke	119.18	-5.6	outcrop	microatoll	MLW-LAT	coral	5.52	0.066	0.1	0.12	SLIP	n/a	Bender et al 2020
Borneo	Tanjung Datu	109.647	2.059	core	microatoll	MLW-LAT	coral	6.128	0.37	2.38	1	terr lim	no	Majewski et al 2018		sl inferred from height above HLS (highest level of survival) and corr for tectonics; ENSO affected
Borneo	Talang Besar	109.775	1.913	core	microatoll	MLW-LAT	coral	7.03	0.29	0.65	0.78	terr lim	no	Majewski et al 2018		sl inferred from height above HLS (highest level of survival) and corr for tectonics; ENSO affected
Cocos islands	Pulu Pandan	96.9	-12.2	outcrop	microatoll	MLW-LAT	coral	3.17	0.25	0.97	0.53	SLIP	yes	Woodroffe et al1990 updated by Mann et al 2019	not reported
Cocos islands	West Island	96.9	-12.2	outcrop	microatoll	MLW-LAT	coral	2.91	0.23	0.62	0.53	SLIP	n/a	Woodroffe et al1990 updated by Mann et al 2019	not reported
Marshall islands	Majuro island	171.368	7.984	outcrop	microatoll	MLW-LAT	coral	2.1	0.16	1.13	0.08	SLIP	yes	Kayanne et al 2011	dGPS	recal dismissed (no raw data available)
French Polynesia	Tikehau	-148.284	-15.018	outcrop	microatoll	MLWN_LAT	Porites	3.33	0.05	0.59	0.77	SLIP	yes	Hallmann et al 2018	dGPS	data from suppl, do not agree with processed data shown in the main text
French Polynesia	Bora Bora	-151.701	-16.451	outcrop	microatoll	MLWN_LAT	Porites	3.12	0.05	0.56	0.6	SLIP	n/a	Hallmann et al 2018	dGPS
French Polynesia	Bora Bora	-151.701	-16.451	outcrop	microatoll	MLWN_LAT	Porites	2.72	0.04	0.53	0.57	SLIP	n/a	Hallmann et al 2018	dGPS
French Polynesia	Bora Bora	-151.701	-16.451	outcrop	microatoll	MLWN_LAT	Porites	2.87	0.04	0.27	0.57	SLIP	n/a	Hallmann et al 2018	dGPS
Samoa Islands	Upolu	171.26	-14.173	core	carb facies	intertidal	coral	2.05	0.1	1.12	0.08	SLIP	yes	Kane et al 2017	dGPS
Samoa Islands	Upolu	171.26	-14.173	core	carb facies	intertidal	coral	3.248	0.098	0.6	0.17	SLIP	n/a	Kane et al 2017	dGPS
Hawaii	Oahu	-157.7	21.39	excavation	carb facies	intertidal	P. compressa	3.992	0.744	1.81	0.15	SLIP	yes	Grossman and Fletcher III 1998		recal thi study; DR=-132±280
Hawaii	Oahu	-157.7	21.39	excavation	carb facies	intertidal	P. compressa	2.515	0.727	1.43	0.15	SLIP	n/a	Grossman and Fletcher III 1998
Kiritimati (Christmas) Islands	Line	157.32	1.98	outcrop	coral reef	NE point modern microatoll	coral	3.023	0.187	0.44	0.69	SLIP	yes	Woodroffe et al 2012 updated by Tan et al 2023	dGPS and ellipsoid model	RWL is lowest tide observed around island; geoid peak in the modern lagoon with mean ss height variations of ~1m
Kiritimati (Christmas) Islands	Line	157.33	1.8	outcrop	coral reef	NE point modern microatoll	coral	4.73	0.154	0.27	0.69	SLIP	n/a	Woodroffe et al 2012 updated by Tan et al 2023	dGPS and ellipsoid model	RWL is lowest tide observed around island; geoid peak in the modern lagoon with mean ss height variations of ~1m
Kiritimati (Christmas) Islands	Line	157.39	1.83	outcrop	coral reef	NE point modern microatoll	coral	5.248	0.181	0.08	0.69	SLIP	n/a	Woodroffe et al 2012 updated by Tan et al 2023	dGPS and ellipsoid model	RWL is lowest tide observed around island; geoid peak in the modern lagoon with mean ss height variations of ~1m
Kiritimati (Christmas) Islands	Line	157.42	1.81	outcrop	coral reef	NE point modern microatoll	coral	1.952	0.319	0.2	0.69	SLIP	n/a	Woodroffe et al 2012 updated by Tan et al 2023
Fiji Islands	Southern Viti Levu	177.7	-18.2	?	beachrock	LAT - HAT	coral	3.963	0.157	0.97	0.95	SLIP	yes	Tan et al 2023		from published database
Fiji Islands	Ovalau	178.8	-17.7	?	coral reef	up to MHWN	coral	5.458	0.18	1.8	0.69	mar lim	no	Tan et al 2023
Fiji Islands	Ovalau	178.8	-17.7		coral reef	up to MHWN	coral	3.258	0.186	1.5	0.69	mar lim	no	Tan et al 2023
Cook Islands	Rarotonga	159.73	-21.25		facies	LAT - HAT	coral	5.92	0.05	1.93	0.89	SLIP	yes	Tan et al 2023
Cook Islands	Aitutaki	159.79	-18.84	outcrop	microatoll	LAT to MLWN	peat	1.567	0.396	0.8	0.23	SLIP	n/a	Tan et al 2023
Cook Islands	Suwarrow	163.05	-13.29	outcrop	coral reef	up to MHWN	Porites	4.8	0.265	1.5	0.63	mar lim	no	Tan et al 2023
Tuamotu	Pukarua	137.07	-18.28	outcrop	beachrock	LAT - HAT	coral	4.442	0.287	0.54	0.7	SLIP	n/a	Tan et al 2023
Tuamotu	Hao	140.95	-18.07	outcrop	beachrock	LAT - HAT	coral	3.645	0.279	1.2	0.78	SLIP	yes	Tan et al 2023
Tuamotu	Apataki	146.43	-15.52	outcrop	beachrock	LAT - HAT	coral	1.493	0.233	0.32	0.39	SLIP	n/a	Tan et al 2023
Tuamotu	Apataki	146.43	-15.52	outcrop	beachrock	LAT - HAT	coral	3.203	0.4	0.27	0.39	SLIP	n/a	Tan et al 2023
Sri Lanka	southwest coast	80.051	6.168	core	coral reef	-1.4 to -4m	Montipora	6.326	0.213	3.2	1.35	SLIP	yes	Katupotha 1988	levelling	sl calculated this study using IR and IM provided by author; recal thi study			DR=-110±22
Sri Lanka	southwest coast	80.051	6.168	core	coral reef	-1.4 to -4m	Platygyra	6.52	0.196	2.7	1.35	SLIP	n/a	Katupotha 1988	levelling	sl calculated this study using IR and IM provided by author
Sri Lanka	southwest coast	80.051	6.168	core	coral reef	-1.4 to -4m	Acropora	5.661	0.225	3.1	1.35	SLIP	n/a	Katupotha 1988	levelling
Gulf of Carpentaria	Christmas Creek	140.684	-17.551	core	facies of chenier	HWS-LWS	shell hash	6.045	0.59	1.25	1	terr lim	no	Rhodes 1982 updated by Sloss et al 2018
Gulf of Carpentaria	South Wellesley Islands	139.501	-16.984	core	facies	HWS-LWS	bivalve	6.52	0.24	0.84	2	SLIP	yes	Sloss et al 2018	dGPS ±0.05m	macrotidal coast; tropical storms
Gulf of Carpentaria	South Wellesley Islands	139.501	-16.984	outcrop	FBI	HWS-LWN	oyster	5.6	0.24	2.7	1.75	terr lim	no	Sloss et al 2018	dGPS ±0.05m	encrusting indicators tend to indicate RSL ~0.5 m higher than microatolls (Lewis et al 2008)
Gulf of Carpentaria	South Wellesley Islands	139.501	-16.984	core	facies	HWS-LWS	gastropod	4.27	0.29	0.2	2	SLIP	n/a	Sloss et al 2018	dGPS ±0.05m
Gulf of Carpentaria	South Wellesley Islands	139.501	-16.984	core	facies	HWS-LWS	gastropod	2.721	0.025	0.2	2	SLIP	n/a	Sloss et al 2018	dGPS ±0.05m
Queensland (Australia)	Magnetic Island	146.084	-19.084		mictroatoll	LAT-MLWST	coral	6.194	0.209	0.94	0.37	SLIP	yes	Chappell et al 1983 updated by Woodroffe 2009		recal thi study; DR=-208±14
Queensland (Australia)	Magnetic Island	146.084	-19.084		mictroatoll	LAT-MLWST	coral	5.604	0.276	0.44	0.37	SLIP	n/a	Chappell et al 1983 updated by Woodroffe 2009		recal thi study; DR=-208±14
Queensland (Australia)	Magnetic Island	146.084	-18.912	outcrop	microatoll	MLWS-LAT	coral	5.318	0.276	0.24	0.37	SLIP	n/a	Chappell et al 1983 revisd by Woodroffe et al 2009		recal thi study; DR=-208±14
Australia (New South Wales)	Bulli Beach	150.92	-34.34	outcrop	estuarine facies	?	terr plant	6.88	0.05	1.19	0.2	SLIP	yes	Dougherty et al 2019
Australia (New South Wales)	North Wollongong	150.8	-34.4	estuarine mud	estuarine facies	?	Mangrove root in situ	7.382	0.16	1.05	1.28	SLIP	n/a	Jones et al 1979 updated by Sloss et al 2007		SLIP based on encrusting molluscs; recal this study, DR=-176±16
Australia (New South Wales)	South Wollongong	150.8	-34.4	estuarine mud	estuarine facies	?	L australis	5.047	0.215	1.3	1.28	SLIP	n/a	Baker and Haworth 2001b updated by Sloss et al 2007		DR=-176±16
Australia (New South Wales)	North Wollongong	150.8	-34.4	estuarine mud	Callicoma stump in situ	?	shell	7.473	0.316	1.84	1.28	SLIP	n/a	Jones et al 1979 updated by Sloss et al 2007		SLIP based on encrusting molluscs; recal this study, DR=-176±16
Australia (New South Wales)	Minnamurra River	150.85	-34.62	?	organic mud with zostera	?		4.842	0.303	1.5	1.28	SLIP	n/a	Baker and Haworth 1997 updated by Sloss et al 2007		recal thi study, DR=-176±16
Australia (New South Wales)	Port Hacking	151.12	-34.06	?	barnacle permieter	?	shell	5.185	0.204	1.2	1.28	SLIP	n/a	Baker et al 2000 updated by Sloss et al 2007		recal thi study, DR=-176±16
Australia (South)	Ceduna area	133.42	-32.15	core	Mangrove facies	?	bulk organic	6.756	0.502	-0.63	0.4	SLIP	no	Belperio et al 2002		recal thi study, DR=-375±179
Australia (South)	Eyre Island	135.528	-34.6842	outcrop	facies	intertidal	shell	3.147	0.409	0.4	0.4	SLIP	n/a	Belperio et al 2002		RWL=LW, here 1m around MSL; recal this study, DR=-130±12
Australia (South)	Port Lincoln area	135.528	-34.6842	core	shell	intertidal	shell	3.028	0.401	1.4	0.4	SLIP	n/a	Belperio et al 2002
Australia (South)	Port Lincoln area	135.528	-34.6842	core	facies	intertidal	bulk organics	4.129	0.261	0.79	0.4	SLIP	n/a	Belperio et al 2002
Australia (South)	Franklin Harbour	136.954	-33.7477	core	facies	intertidal	Ostrea angasi	4.196	0.274	0.85	0.55	SLIP	n/a	Belperio et al 2002
Australia (South)	Franklin Harbour	136.954	-33.7477	core	facies	intertidal	Ostrea angasi	5.562	0.242	1.2	0.55	SLIP	yes	Belperio et al 2002
Australia (South)	Franklin Harbour	136.954	-33.7477	core	facies	intertidal	Katelysia sp.	3.484	0.321	2.1	0.55	terr lim	no	Belperio et al 2002
Australia (South)	Port Adelaide	138.28	-34.5		facies	intertidal	Katelysia rhytiphora	5.82	0.232	1.42	0.5	SLIP	yes	Belperio et al 2002
Australia (West)	Abrolhos islands	113.818	-28.668	platform	peritidal reef platform	lagoon shore	coral	6.832	0.03	1.62	0.05	SLIP	yes	Collins et al 2006
Australia (West)	Abrolhos islands	113.818	-28.668	platform	peritidal reef platform	lagoon shore	coral	6.919	0.03	1.42	0.05	SLIP	n/a	Collins et al 2006
Australia (West)	Abrolhos islands	113.818	-28.668	platform	peritidal reef platform	lagoon shore	coral	3.831	0.03	0.78	0.05	SLIP	n/a	Collins et al 2006
SE India	Rameswaram Island	79.29	9.28	outcrop	porites colony	shoreface	Porites	5.6	0.292	1.8	0.8	SLIP	n/a	Banerjee 2000	tape and abney	RSL calculated this study on the basis of modern analogue IR; average LTW is at 0.4m; original sl: 1.40 LTL
SE India	Rameswaram Island	79.29	9.28	outcrop	porites colony	shoreface	Porites	4.179	0.34	2.1	0.8	SLIP	yes	Banerjee 2000	tape and abney	RSL calculated this study on the basis of modern analogue IR; average LTW is at 0.4m; original sl: 1.70 LTL
SE India	Rameswaram Island	79.29	9.28	outcrop	porites colony	shoreface	Porites	6.84	0.386	1.4	0.8	SLIP	n/a	Banerjee 2000	tape and abney	RSL calculated this study on the basis of modern analogue IR; average LTW is at 0.4m; original sl: 2.90 LTL
NW India	Gulf of Kachchh	69.4	22.8	excavation	facies	lower intertidal	shell	7.3	0.4	1.45	0.33	SLIP	no	Sharma et al 2020	dGPS	significant sed supply from Indus delta; data corrected for tectonics
NW India	Gulf of Kachchh	69.4	22.8	excavation	facies	upp int	shell	1.05	0.18	0.53	0.43	SLIP	n/a	Sharma et al 2020
Philippine Sea	Minami Daito island	131.24	25.85	cave	phreatic overgrowth	MHW-MLW	carbonate from overgrowths	4.83	0.23	0	0	mar lim	no	Miklavic et al 2018	tidal range adopted to groundwater level
Philippine Sea	Minami Daito island	131.24	25.85	cave	phreatic overgrowth	MHW-MLW	carbonate from overgrowths	2.53	0.21	0	0	SLIP	yes	Miklavic et al 2018	tidal range adopted to groundwater level
Arabian Gulf	Abu Dhabi coast	54.02	24.19	outcrop	microbial mat	lagoon, tidal flat	foram	6.3	0.4	1.6	0.4	SLIP	yes	Mauz et al 2022
Arabian Gulf	North Qatar	54.02	24.19	outcrop	carb sand	lagoon, tidal flat	foram	5.81	0.12	1.33	0.6	SLIP	n/a	Rivers et al 2020 recal by Mauz et al 2022
Arabian Gulf	Abu Dhabi coast	54.02	24.19	outcrop	carb sand	lagoon, tidal flat	foram	2.79	0.37	0.97	0.19	SLIP	n/a	Mauz et al 2022
Red Sea Yemen	As-Salif Peninsula	42.66	15.27	outcrop	coral and corresponding notch	intertidal	coral	4.95	0.03	3	0.5	SLIP	yes	Al-Mikhlafi et al 2020	dGPS
Red Sea Yemen	As-Salif Peninsula	42.66	15.27	outcrop	coral and corresponding notch	intertidal	coral	5.42	0.05	2.5	0.5	SLIP	n/a	Al-Mikhlafi et al 2020	dGPS
Mediterranean (Tunisia)	El Grine	10.451	33.651	outcrop	facies	intertidal	shell	5.8	0.2	1.4	0.4	SLIP	no	Mauz et al 2015	tape and abney
Atlantic Algarve	Carcavei estuary	-8.07477	37.0574	outcrop	facies	MTL to -2m	chacoal	6.289	0.107	-1.99	0.46	SLIP	n/a	Schneider et al. 2010; Trog et al. 2015 updated by García-Artola et al. 2018
Atlantic Algarve	Alvor estuary	-8.59439	37.1514	outcrop	facies	MTL to -2m	chacoal	5.588	0.089	-0.83	1.01	SLIP	yes	Trog et al. 2013 updated by García-Artola et al. 2018
Atlantic Algarve	Alvor estuary	-8.59439	37.1514		facies	MTL to -2m	chacoal	4.061	0.148	-0.03	1.01	SLIP	n/a	Trog et al. 2013 updated by García-Artola et al. 2018
Atlantic Mauretania	Banc d'Arguin	-16.338	19.579	outcrop	facies	beach		5.64	0.09	-0.63	0.12	SLIP	n/a	Certain et al 2018	total station
Atlantic Mauretania	Banc d'Arguin	-16.234	19.884	outcrop	facies	beach		4.65	0.65	-0.11	0.2	SLIP	yes	Certain et al 2018	total station
Atlantic Mauretania	Banc d'Arguin	-16.234	19.884	outcrop	facies	beach		3.43	0.07	0.05	0.1	SLIP	n/a	Certain et al 2018	total station
Atlantic Mauretania	Edjaila	-16.418	21.751	outcrop	facies	lagoon	shell	5.336	0.38	1	1.3	SLIP	yes	Delibrias et al 1976 updated by Vacchi et al 2025
Atlantic Casamance	Casamance	-16.7	12.5	outcrop	beachrock	MSL to -1m	shell	3.276	0.408	0.5	1.1	SLIP	n/a	Faure et al. 1974 updated by Vacchi et al 2025
Atlantic Western Sahara	Mahariat	-16.918	22.268	outcrop	facies	lagoon	shell	5.447	0.12	1.5	1.3	SLIP	yes	Delibrias et al 1976 updated by Vacchi et al 2025
SW Indian Ocean	Zanzibar	39.201	-5.934	core	mangrove pollen		bulk organics	7.96	0.86	-4.32	0.83	SLIP	n/a	Woodroffe et al 2015
SW Indian Ocean	Zanzibar	39.201	-5.934	core	mangrove pollen	MTL-MHWST=1.65		7.671	0.083	-3.58	0.83	SLIP	n/a	Woodroffe et al 2015
SW Indian Ocean	Zanzibar	39.201	-5.934	core	mangrove pollen			4.43	0.14	-2.33	0.83	SLIP	yes	Woodroffe et al 2015
SW Indian Ocean	Zanzibar	39.201	-5.934	core	mangrove pollen			3.21	0.139	-2	0.83	SLIP	n/a	Woodroffe et al 2015
Indian Ocean	Seychelles	55.501	4.668	core	in-situ massive coral colony	3.7±3m	coral	5.77	0.07	-4.75	3		yes	Braithwaite et al 2000 taken from Woodroffe et al 2015b (Seychelles)
Indian Ocean	Seychelles	55.501	4.668	core	in-situ massive coral colony	3.7±3m	coral	4.11	0.04	-3	3		n/a	Braithwaite et al 2000 taken from Woodroffe et al 2015b (Seychelles)
Indian Ocean	Mauritius	57.501	-20.334	core	in-situ massive coral colony	not reported	Galaxea coral	6.2	0.3	-10.7	0.321	marine lim	no	Camoin et al 1997	depths in core	RSL inferred from depth in core
Indian Ocean	Mauritius	57.501	-20.334	core	in-situ massive coral colony	not reported	Galaxea coral	5.5	0.2	-7.7	0.154	marine lim	yes	Camoin et al 1997	depths in core	RSL inferred from depth in core
Indian Ocean	Mauritius	57.501	-20.334	core	in-situ massive coral colony	not reported	Galaxea coral	4.2	0.2	-5	0.25	marine lim	no	Camoin et al 1997	depths in core	RSL inferred from depth in core
Indian Ocean	Mauritius	57.501	-20.334	core	in-situ massive coral colony	not reported	Galaxea coral	3.4	0.2	-2.2	0.044	marine lim	no	Camoin et al 1997	depths in core	RSL inferred from depth in core
Indian Ocean	Reunion	55.32	-21.7	core	in-situ branching coral colony	not reported	Acropora	6.9	0.2	-10.4	0.104	marine lim	no	Camoin et al 1997	depths in core	RSL inferred from depth in core
Indian Ocean	Reunion	55.32	-21.7		in-situ branching coral colony	not reported	Acropora	4.5	0.1	-4.75	0.095	marine lim	yes	Camoin et al 1997	depths in core	RSL inferred from depth in core
Indian Ocean	Reunion	55.32	-21.7		in-situ branching coral colony	not reported	Acropora	2.9	0.3	-2	0.04	marine lim	no	Camoin et al 1997	depths in core	RSL inferred from depth in core
Caribbean Sea	Barbados	-59.51	13.04	?	coral	0 to -5 MLLW	coral?	4.26	0.17	0.8	2.65	SLIP	yes	Khan et al 2017		MLLW=mean lower low water
Caribbean Sea	Barbados	-59.44	13.11	?	coral	1 to -5 MLLW	coral?	3.87	0.2	0.19	2.64	SLIP	n/a	Khan et al 2017
Caribbean Sea	Barbados	-59.51	13.04	?	coral	2 to -5 MLLW	coral?	2.59	0.17	0.8	2.65	SLIP	n/a	Khan et al 2017
S-California	S Rosa Island	-119.98	33.96	core	pollen sed chemistry	saltmarsh	bulk organics	4.17	0.53	-4.73	1.2	SLIP	n/a	Cole and Liu, 1994 updated by Reynold and Simms 2015
S-California	S Rosa Island	-119.98	33.96	core	pollen sed chemistry	saltmarsh	bulk organics	5.8	0.71	-6.09	1.21	SLIP	yes	Cole and Liu, 1994 updated by Reynold and Simms 2015
S-California	S Rosa Island	-119.98	33.96	core	pollen, diatoms	saltmarsh	charcoal	4.1	0.17	-5.04	1.2	SLIP	n/a	Anderson et al., 2010 updated by Reynold and Simms 2015
S-California	S Rosa Island	-119.98	33.96	core	pollen sed chemistry	saltmarsh	charcoal	4.96	0.25	-5.54	1.21	SLIP	n/a	Cole and Liu, 1994 taken from Reynold and Simms 2015
Florida	St Marys River	-81.59	30.71	core	foraminifera	saltmarsh	Juncus rhizome	2.509	0.157	-2.44764	0.494038	SLIP	n/a	Hawkes et al 2016
Florida	St Marys River	-81.59	30.71	core	foraminifera	saltmarsh	Horizontal leaf	2.977	0.093	-2.75464	0.496938	SLIP	n/a	Hawkes et al 2016
Florida	St Marys River	-81.59	30.71	core	foraminifera	saltmarsh	Horizontal bark	3.629	0.061	-2.49464	0.494438	SLIP	n/a	Hawkes et al 2016
Florida	St Marys River	-81.59	30.71	core	foraminifera	saltmarsh	Juncus rhizome	5.17	0.123	-3.44864	0.504238	SLIP	n/a	Hawkes et al 2016
Florida	St Marys River	-81.59	30.71	core	foraminifera	saltmarsh	Plant fragments	5.793	0.126	-4.93064	0.518638	SLIP	yes	Hawkes et al 2016
Florida	St Marys River	-81.59	30.71	core	foraminifera	saltmarsh	Woody fragment	7.5935	0.0795	-6.20864	0.531038	SLIP	n/a	Hawkes et al 2016
Florida	St Marys River	-81.59	30.71	core	foraminifera	saltmarsh	Horizontal bark	7.8015	0.1145	-6.31864	0.532138	SLIP	n/a	Hawkes et al 2016
Florida	St Marys River	-81.59	30.71	core	foraminifera	saltmarsh	Woody fragment	3.9745	0.1065	-3.60764	0.505938	SLIP	n/a	Hawkes et al 2016
Florida	St Marys River	-81.59	30.71	core	foraminifera	saltmarsh	Woody fragment	5.571	0.086	-3.88164	0.508438	SLIP	n/a	Hawkes et al 2016
Florida	St Marys River	-81.59	30.71	core	foraminifera	saltmarsh	Plant fragments	6.5995	0.1135	-4.75164	0.517038	SLIP	n/a	Hawkes et al 2016
Florida	St Marys River	-81.59	30.71	core	foraminifera	saltmarsh	Horizontal leaf	6.35	0.052	-4.85464	0.517938	SLIP	n/a	Hawkes et al 2016
Florida	St Marys River	-81.59	30.71	core	foraminifera	saltmarsh	Woody fragment	7.45	0.108	-5.96564	0.528138	SLIP	n/a	Hawkes et al 2016
Florida	St Marys River	-81.59	30.71	core	foraminifera	saltmarsh	Plant fragments	7.6275	0.0505	-6.18864	0.530538	SLIP	n/a	Hawkes et al 2016
Florida	St Marys River	-81.59	30.71	core	foraminifera	saltmarsh	Woody fragment	7.3515	0.0725	-5.77864	0.526438	SLIP	n/a	Hawkes et al 2016
Florida	St Marys River	-81.59	30.71	core	foraminifera	saltmarsh	Woody plant fragments	6.842	0.1	-5.17164	0.521437	SLIP	n/a	Hawkes et al 2016
Florida	St Marys River	-81.59	30.71	core	foraminifera	saltmarsh	Reed	7.2365	0.0795	-5.94164	0.527938	SLIP	n/a	Hawkes et al 2016
Suriname	Suriname	-56.62	5.65	?	mangrove peat	MTL to HAT		5.89	0.3	0.39	1.47	?	yes	Khan et al 2017		compaction corrected
Brazil (R Grande do Norte)	Areia Branca	-36.59	-5.13	outcrop	beachrock	intertidal	bivalve	3.321	0.111	2	1	SLIP	n/a	Bezarra et al 2003	leveling	recal this study
Brazil (R Grande do Norte)	Areia Branca	-36.59	-5.13	outcrop	beachrock	intertidal	bivalve	2.5375	0.10125	1.2	1	SLIP	n/a	Bezarra et al 2003
Brazil (R Grande do Norte)	Natal coast	-35.2	-5.82	outcrop	beachrock	intertidal	bivalve	1.886	0.0925	2.1	1	SLIP	yes	Bezarra et al 2003
Brazil (R Grande do Sul)	Curumim barrier	-50.51	-30.67	GPR	facies	barrier	quartz OSL	5.03	0.91	1.8	1	terr lim	no	Bardoza et al 2021		elevation error assumed by BM
Brazil (R Grande do Sul)	Curumim barrier	-50.51	-30.67	GPR	facies	barrier	quartz OSL	4.38	1.04	1.5	1	terr lim	no	Bardoza et al 2021		elevation error assumed by BM
Uruguay	Esmeralda11	-53.2318	-33.4456	outcrop	sediment	beach storm	Mactra isabelleana shell	5.8265	0.08275	4.75	0.25	terr lim	no	Martinez and Roja 2013	unclear	elevation inaccurate; recal this study
Uruguay	VSoriano4	-58.1932	-33.2423	outcrop	sediment	beach storm	Erodona mactroides shell	6.6615	0.08675	3.5	0.25	Slip	no	Martinez and Roja 2013	unclear	elevation inaccurate
Uruguay	SAuceNP1	-58.2443	-33.5032	outcrop	sediment	beach storm	Anomalocardia brasiliana shell	6.488	0.085	2.75	0.25	Slip	no	Martinez and Roja 2013	unclear	elevation inaccurate
Rio de la Plata estuary	Potrero Manantiales	-59.2812	-33.1348		sediment	beach ridge	Erodona mactroides shell	6.511	0.224	4.5	1	terr lim	no	Prieto et al 2017	the elevation of estuarine molluscs collected in beach ridges used as palaeo-sl
Patagonia	Camarones	-65.431	-44.48	outcrop	in situ barbacles and encrusting forams	cliff/shore platform	encrustation	5.33	0.23	3.6	1.7	SLIP	n/a	Bini et al 2018	dGPS
Patagonia	Camarones	-65.431	-44.48	outcrop	in situ barbacles and encrusting forams	cliff/shore platform	bivalve	5.98	0.12	3.9	1.4	SLIP	yes	Bini et al 2018	dGPS
Chile	Bay of Tongoy	-71.74	-30.27	outcrop	facies	inter-subtidal	bivalve	7.19	0.46	1.81	0.56	mar lim	no	Ota and Paskoff updated by Garrett et al 2020	corrected from earlier paper	corrections well justified
Chile	Antofagasto	-70.28	-22.711	outcrop	facies	inter-subtidal	bivalve	6.998	0.327	1.61	0.56	mar lim	no	Leonard and Wehmiller updated by Garrett et al 2020	corrected from earlier paper	corrections well justified
Chile	Valparaiso	-71.52	-32.8	outcrop	facies	MTL-HAT	organics?	6.054	0.123	1.8	0.23	SLIP	yes	Dura et al 2015 updated by Garrett et al 2020	corrected from earlier paper	corrections well justified

## Sheet: readme
Item	Description
selection of RSL indicators	no limiting points (but retained in database), avoid delta, macrotidal coast, estuarine wetland, chenier, beach ridge, coastal sandy barrier, pothole fill, tubeworm, calc foraminifera transfer, oyster bed, volcanic area.
selection of data points from large databases*	guided by general interpretation of authors, datapoints selected accordingly
recal this study	age re-calibrated using CALIB rev. 8 (Stuiver, M., and Reimer, P.J., 1993, Radiocarbon, 35, 215-230) accessed July 2025.
Marine20	Tan et al. 2023 ('far-field islands in the mid-Pacific', version 1.0); Mann et al. 2019 (SEAMIS database, supplement to paper);+C5+B5 Sloss et al. 2007 (integrated data table): Bender et al. 2020 (integrated data table); Belperio et al. 2002 (integrated data table); Garrett et al 2020 (supplement to paper)
IntCal20	Northern Hemisphere Radiocarbon Age Calibration Curve (Reimer et al. 2020, Radiocarbon 62, 725-757; doi: 10.1017/RDC.2020.41)
SHCal20	Southern Hemisphere Calibration (Hogg et al. 2020, Rdiocarbon 62; doi: 10.1017/RDC.2020.59)
orange-bold	Th-230 age
RWL	reference water level
ss	sea surface
FBI	fixed biological indicator
depos env	depositional environment, indicative range of indicator, e.g. water depth
terr lim	terrestrial limiting, i.e. the shoreline is BELOW this point
mar lim	marine limiting, i.e. the shoreline is ABOVE this point
SLIP	sea-level index point, i.e. the shoreline is at this point in space and time
*large databases	Tan et al. 2023 ('far-field islands in the mid-Pacific', version 1.0); Mann et al. 2019 (SEAMIS database, supplement to paper); Sloss et al. 2007 (integrated data table): Bender et al. 2020 (integrated data table); Belperio et al. 2002 (integrated data table); Garrett et al. 2020 (supplement to paper)

## Sheet: References
Bender, M. et al. Late Holocene (0–6 ka) sea-level changes in the Makassar Strait, Indonesia. Clim. Past 16, 1187–1205 (2020).
Xiong, H. et al. Coastal GIA processes revealed by the early to middle Holocene sea-level history of east China. Quaternary Science Reviews 233, 106249 (2020).
Zong, Y. Mid-Holocene sea-level highstand along the Southeast Coast of China. Quaternary International 117, 55–67 (2004).
Tanabe, S. A 3-kyr plateau of middle Holocene higher sea levels on the central Kanto Plain, Japan. Quaternary Science Reviews 295, 107769 (2022).
Tian, L., Vermeersen, B. L., Wang, F., Li, J. & Wang, H. Holocene sea-level history from the southern Bohai Sea coast, China: Far-field GIA processes and an associated mid-Holocene sea-level highstand. Quaternary Science Reviews 351, 109166 (2025).
Yu, K.-F., Zhao, J.-X., Done, T. & Chen, T.-G. Microatoll record for large century-scale sea-level fluctuations in the mid-Holocene. Quat. res. 71, 354–360 (2009).
Yokoyama, Y. et al. Holocene sea‐level change and Antarctic melting history derived from geological observations and geophysical modeling along the Shimokita Peninsula, northern Japan. Geophysical Research Letters 39, 2012GL051983 (2012).
Chua, S. et al. A new Holocene sea-level record for Singapore. The Holocene 31, 1376–1390 (2021).
Scheffers, A. et al. Holocene sea levels along the Andaman Sea coast of Thailand. The Holocene 22, 1169–1180 (2012).
Mann, T. et al. Holocene sea levels in Southeast Asia, Maldives, India and Sri Lanka: The SEAMIS database. Quaternary Science Reviews 219, 112–125 (2019).
Zhang, Y. et al. The middle-to-late Holocene relative sea-level history, highstand and levering effect on the east coast of Malay Peninsula. Global and Planetary Change 196, 103369 (2021).
Azmy, K., Edinger, E., Lundberg, J. & Diegor, W. Sea level and paleotemperature records from a mid-Holocene reef on the North coast of Java, Indonesia. Int J Earth Sci (Geol Rundsch) 99, 231–244 (2010).
Mann, T. et al. The magnitude of a mid-Holocene sea-level highstand in the Strait of Makassar. Geomorphology 257, 155–163 (2016).
Majewski, J. M. et al. Holocene relative sea-level records from coral microatolls in Western Borneo, South China Sea. The Holocene 28, 1431–1442 (2018).
Kayanne, H., Yasukochi, T., Yamaguchi, T., Yamano, H. & Yoneda, M. Rapid settlement of Majuro Atoll, central Pacific, following its emergence at 2000 years CalBP: RAPID SETTLEMENT OF ATOLL. Geophys. Res. Lett. 38, n/a-n/a (2011)
Kane, H. H. et al. Coastal plain stratigraphy records tectonic, environmental, and human habitability changes related to sea-level drawdown, ‘Upolu, Sāmoa. Quat. res. 87, 246–257 (2017).
Fukuyo, N., Clark, G., Purcell, A., Parton, P. & Yokoyama, Y. Holocene sea level reconstruction using lagoon specific local marine reservoir effect and geophysical modeling in Tongatapu, Kingdom of Tonga. Quaternary Science Reviews 244, 106464 (2020).
Woodroffe, C. D., McGregor, H. V., Lambeck, K., Smithers, S. G. & Fink, D. Mid-Pacific microatolls record sea-level stability over the past 5000 yr. Geology 40, 951–954 (2012).
Ranasinghe, P. N. et al. Mid–Late Holocene coastal environmental changes in southeastern Sri Lanka: New evidence for sea level variations in southern Bay of Bengal. Quaternary International 298, 20–36 (2013).
Sloss, C. R. et al. Holocene sea-level change and coastal landscape evolution in the southern Gulf of Carpentaria, Australia. The Holocene 28, 1411–1430 (2018).
Sloss, C. R., Murray-Wallace, C. V. & Jones, B. G. Holocene sea-level change on the southeast coast of Australia: a review. The Holocene 17, 999–1014 (2007).
Woodroffe, S. A. Testing models of mid to late Holocene sea-level change, North Queensland, Australia. Quaternary Science Reviews 28, 2474–2488 (2009).
Woodroffe, S. A., Long, A. J., Milne, G. A., Bryant, C. L. & Thomas, A. L. New constraints on late Holocene eustatic sea-level changes from Mahé, Seychelles. Quaternary Science Reviews 115, 1–16 (2015).
Woodroffe, S. A. et al. Radiocarbon dating of mangrove sediments to constrain Holocene relative sea-level change on Zanzibar in the southwest Indian Ocean. The Holocene 25, 820–831 (2015).
Dougherty, A. J. et al. Redating the earliest evidence of the mid-Holocene relative sea-level highstand in Australia and implications for global sea-level rise. PLoS ONE 14, e0218430 (2019).
Collins, L. B., Zhao, J.-X. & Freeman, H. A high-precision record of mid–late Holocene sea-level events from emergent coral pavements in the Houtman Abrolhos Islands, southwest Australia. Quaternary International 145–146, 78–85 (2006).
Sharma, S. et al. Causes and implications of Mid- to Late Holocene relative sea-level change in the Gulf of Kachchh, western India. Quat. res. 100, 98–121 (2021).
Miklavič, B., Yokoyama, Y., Urata, K., Miyairi, Y. & Kan, H. Holocene relative sea level history from phreatic overgrowths on speleothems (POS) on Minami Daito Island, Northern Philippine Sea. Quaternary International 471, 359–368 (2018).
Mauz, B. et al. The mid-Holocene sea-level change in the Arabian Gulf. The Holocene 32, 1173–1183 (2022).
Mauz, B., Ruggieri, G. & Spada, G. Terminal Antarctic melting inferred from a far-field coastal site. Quaternary Science Reviews 116, 122–132 (2015).
Rivers, J. et al. Are carbonate barrier islands mobile? Insights from a mid to late‐Holocene system, Al Ruwais, northern Qatar. Sedimentology 67, 534–558 (2020).
Al-Mikhlafi, A. S., Hibbert, F. D., Edwards, L. R. & Cheng, H. Holocene relative sea-level changes and coastal evolution along the coastlines of Kamaran Island and As-Salif Peninsula, Yemen, southern Red Sea. Quaternary Science Reviews 252, 106719 (2021).
Khan, N. S. et al. Drivers of Holocene sea-level change in the Caribbean. Quaternary Science Reviews 155, 13–36 (2017).
Reynolds, L. C. & Simms, A. R. Late Quaternary relative sea level in Southern California and Monterey Bay. Quaternary Science Reviews 126, 57–66 (2015).
Hawkes, A. D. et al. Relative sea-level change in northeastern Florida (USA) during the last ∼8.0 ka. Quaternary Science Reviews 142, 90–101 (2016).
Bezerra, F. H. R., Barreto, A. M. F. & Suguio, K. Holocene sea-level history on the Rio Grande do Norte State coast, Brazil. Marine Geology 196, 73–89 (2003).
Barboza, E. G. et al. Holocene Sea-Level Changes in Southern Brazil Based on High-Resolution Radar Stratigraphy. Geosciences 11, 326 (2021).
Martínez, S. & Rojas, A. Relative sea level during the Holocene in Uruguay. Palaeogeography, Palaeoclimatology, Palaeoecology 374, 123–131 (2013).
Prieto, A. R. et al. Relative sea-level changes during the Holocene in the Río de la Plata, Argentina and Uruguay: A review. Quaternary International 442, 35–49 (2017).
Bird, M. I. et al. Punctuated eustatic sea-level rise in the early mid-Holocene. Geology 38, 803–806 (2010).
Bird, M. I. et al. An inflection in the rate of early mid-Holocene eustatic sea-level rise: A new sea-level curve from Singapore. Estuarine, Coastal and Shelf Science 71, 523–536 (2007).
Hallmann, N. et al. Ice volume and climate changes from a 6000 year sea-level record in French Polynesia. Nat Commun 9, 285 (2018).
Barboza, E. G. et al. Holocene Sea-Level Changes in Southern Brazil Based on High-Resolution Radar Stratigraphy. Geosciences 11, 326 (2021).
Bini, M. et al. Mid-Holocene relative sea-level changes along Atlantic Patagonia: New data from Camarones, Chubut, Argentina. The Holocene 28, 56–64 (2018).
Certain, R. et al. New evidence of relative sea-level stability during the post-6000 Holocene on the Banc d’Arguin (Mauritania). Marine Geology 395, 331–345 (2018).
Belperio, A.P. et al. Spatial and temporal variability in the Holocene sea-level record of the South Australian coastline. Sedimentary Geology 150, 153-169 (2002)
Banerjee, P.K. Holocene and Late Pleistocene relative sea level fluctuations along the east coast of India. Marine Geology 167, 243-260 (2000).
Tam, C.-Y. et al. A below-the-present late Holocene relative sea level and the glacial isostatic adjustment during the Holocene in the Malay Peninsula. Quaternary Science Reviews 201, 206–222 (2018).
Meltzner, A. J. et al. Half-metre sea-level fluctuations on centennial timescales from mid-Holocene corals of Southeast Asia. Nat Commun 8, 14387 (2017).
Grossman, E.E. & Fletcher, C. H. III. Sea level higher than present 3500 years ago on the northern main Hawaiian Islands. Geology 26, 363-366 (1998).
Kathupota, J. Evidence of high sea level during the mid-Holocene on the southwest coast of Sri Lanka. Boreas 17, 209-213 (1988).
Camoin, G. F. et al. Holocene sea level changes and reef development in the southwestern Indian Ocean. Coral Reefs 16, 247-259 (1997).
